# Supplementary material for: Systematic review on wearable lower-limb exoskeletons for gait training in neuromuscular impairments
Source: J Neuroeng Rehabil. 2021 Feb 1;18:22. doi: 10.1186/s12984-021-00815-5 (PMC7852187; doi:10.1186/s12984-021-00815-5)
Supplement: Supplementary file 3 — Additional file 3. Clinical evidence of wearable lower-limb exoskeletons. [file 12984_2021_815_MOESM3_ESM.xlsx]

## Sheet: READ ME
	Additional File 3 . Selected studies with outcome measures. These tables show the main characteristics of the studies selected: number of patients and their demographics, training protocol, training environement and outcome measures.
		INDEX:
		Window 1:	Spinal Cord Injury
		Window 2:	Stroke
		Window 3:	Other Pathologies
		LEGEND:
			Indicates that this study is a Clinical Trial according to the Clinical Trial from National Institutes of Health (NIH) definition of Clinical Trial (https://grants.nih.gov/policy/clinical-trials/definition.htm). See Supplemental Material XX for detailed information
		↑	Positive change
		↔	No change
		↓	Negative change
		X	No comparison
		ABBREVIATIONS:
		STROKE:						OTHER PATHOLOGIES:
		ACI:	Atherothrombic cerbral infarction						CP:	Cerebral Palsy
		SH:	Subcortical Hemorrhage						KH:	Knee Hiperextension
		BSI:	Brain stem infarction						MS:	Multiple Sclerosis
		LI:	Lacunar Infarct						OA:	Osteoarthritis
		ICH:	Intracraneal hemorrhage						PM:	Poliomyelitis
		CH:	Cerebral hemorrhage						SCD:	Spinocerbellar degeneration
		SaH:	Subarachnoid hemorrhage						TBI:	Traumatic Brain Injury
		ABSI:	Atherothrombotic brain stem infarction						BTS:	Brain Tumor Surgery
		B:	Bleeding
		T:	Trauma
		I:	Ischemic
		H:	Hemorrhagic

## Sheet: SCI
					TRAINING																		DEMOGRAPHICS												OUTCOMES
					Training Protocol					Training Environment																					AIS
ID	Reference	Device	Study design		Number of sessions	Duration (min)	Frequency (per week)	Duration (weeks)	Additional Training	Indoor walking	Outdoor walking	Sit-stand	Lateral movement	Ramps	Stairs	Carpet	Grass	Obstacles	Elevator	Doors	Home use	Other	Number (healthy)	Age (years)	Gender (M/F)	Weight (Kg)	Height (m)	Injury level	Complete / Incomplete	TSI (years)	A	B	C	D	10mWT	6MWT	TUG	GAIT SPEED	BLOOD PRESSURE	HEART RATE	MEASURMENT WITH EXO
2	farris2011	Vanderbilt	Experimental validation	Preliminary evaluation	1	__	1	1		✓													1	35	1/0	73	1.85	T10	Complete	8					__	__	__	__	__	__	YES
3	quintero2012	Vanderbilt	Experimental validation	__	1	__	1	1		✓													1	35	1/0	73	1.85	T10	Complete	9	1				__	__	X	__	__	__	YES
4	farris2012	Vanderbilt	Experimental validation	Performance evaluation	1	__	1	1		✓					✓								1	__	1/0	73	1.85	T10	Complete	9	1				__	__	__	__	__	__	YES
5	ha2012	Vanderbilt	Experimental validation	Implementation of a cooperative controller	2	10	1	1		✓													1	36	1/0	75	1.85	T10	Complete	__	1				__	__	__	__	__	__	YES
6	esquenazi2012	ReWalk	Observational study (Cohort study)	Prospective, single-intervention, open, non-randomized	24	75-90	3	8		✓	✓	✓											12	18 - 55	8/4	57 - 89	1,63 - 1,88	T3, T4(2), T6, T7, T8(2), T10(3), T11, T12	Complete	1 - 24					X	X	X	X	X	X	YES
7	zeilig2012	ReWalk	Observational study (Descriptive study)	Case series observational study	7 - 24 (average: 13,7 ; SD: 5,8)	50	__	__		✓		✓											6	21 - 48	6/0	__	__	T5, T7(2), T9, T10, T12	Complete	3 - 7					X	X	X	__	X	X	YES
8	bishop2012	AlterG Bionic Leg	Observational study (Descriptive study)	Case study	7	60	__	2		✓		✓			✓								1	22	0/1	__	__	C5/C6	Incomplete	4				1	↓	↑	↓				NO
9	fineberg2013	ReWalk	Observational study (Cross-sectional study)	Cross-sectional study	__	60-120	3	20 - 24		✓													9 (3)	24 - 62	7/2	50 - 91	1,61 - 1,85	T1, T4(2), T5, T8, T11	Complete	2 - 4	5	1			__	__	__	X	__	__	YES
10	tanabe2013a	WPAL	Experimental validation	Experimental validation	2 ~ 11	60	__	__		✓													7	32 - 61	6/1	42 - 80	1,56 - 1,80	T6(3), T9, T11, T12(2)	Complete	6 - 20	6	1			__	__	__	__	__	__	YES
11	arazpour2013a	Other (PGO)	Observational study (Crossover cohort study)	Devices comparison	24	120	3 (UNA CON CADA EQUIPO)	8	CGT	✓													5	22 - 29	3/2	53 - 65	1,60 - 1,78	T6, T8(2), T10, T12	__	9 - 51	1	4			__	↑	__	↑	__	__	YES
14	tanabe2013b	WPAL	Observational study (Crossover cohort study)	Clinical trial	1939-06-01	1	2-3 times/mont	3-13 months		✓													4	30 - 59	3/1	42 - 67	1,56 - 1,80	T6, T11, T12(2)	Complete	4 - 20					__	__	__	↑	__	↑	YES
15	spungen2013	ReWalk	Observational study (Pre-post study)	NCT01454570	45 ± 20 (15 - 70)	60-120	3	__		✓	✓	✓			✓	✓		✓	✓	✓		✓	7	24 - 61	6/1	64 - 89	1,60 - 1,85	T1, T4(2), T5, T8, T10, T11	Complete	2 - 14					X	X	__	X	__	__	YES
16	jun-young2013	ROBIN	Experimental validation	Biomechanical analysis	1	__	__	__		✓													2 (1)	__	__	__	__	T11	Complete	__					__	__	__	__	__	__	YES
17	talaty2013	ReWalk	Experimental validation	Biomechanical analysis	up to 24	60 - 90	3 (target)	8		✓		✓											12	__	__	__	__	C7 - T12	Complete	__					__	__	__	X	__	__	YES
18	kim2013	Other (PGO)	Pilot study	Preliminary study	80	120	5	16		✓													3	21 - 34	2/1	__	__	T4(2), T6	Complete	2 - 6					__	__	__	↑	__	__	YES
19	kolakowsky-Hayner2013	EKSO	Pilot study	Prospective pilot study	6	First session: 20min ; Second session: 40min and then up to 60min (if tolerated and possible)	6	1		✓													7	19 - 40	5/2	__	__	T4, T7, T8, T10, T11(2), T12	Complete	0,17 - 2	7				__	__	__	X	__	__	YES
21	Del-Ama2014	KINESIS	Pilot study	Pre-post pilto clinical evaluation	8	__	__	__		✓													3	35 - 43	3/0	65 - 75	1,77 - 1,80	L1, L4, L5	Incomplete	__	1			2	↑	↑	__	↑	↔	↔	YES
23	farris2014	Vanderbilt	Observational study (Descriptive study)	Single-subject case study	20	__	__	__		✓		✓											1	42	1/0	75	1.85	T10	Complete	10	1				↑	↑	↑	↑	__	↑	EXO vs KAFO
25	kressler2014	Ekso	Observational study (Descriptive study)	Case Series	18	60	3	6		✓													3	26-38	2/1	68-87	1,63-1,88	T1/T2, T7, T9/T10	Complete	>1	3				X	__	__	↑	__	__	YES
26	kozlowski2015	EKSO	Pilot study	Preliminary study	up to 24	UP TO 120	1 \ 2	__		✓	✓	✓				✓			✓	✓		✓	7	mean = 36	7/0	64 - 89	1,75 - 1,89	C4, C8, T8, T9(2), T10, L1	Complete(5) /Incomplete(2)	0,5 (mean)	3	1	3		__	__	__	X	__	↔	YES
27	evans2015	Indego	Pilot study	__	6 ± 2	__	__	__		✓													5	42 ± 9	4/1	59 - 80	1,72 - 1,85	T5, T7, T8, T10, T12	Complete	11 ± 6	5				__	X	__	X	__	__	YES
29	del-ama2015	KINESIS	Pilot study	Feasibility study	5	__	5	1		✓													3	35 - 43	3/0	65 - 75	1,77 - 1,80	L1, L4, L5	Incomplete	__	1			2	X	X	__	__	X	X	YES
30	ekelem2015	Vanderbilt	Experimental validation	Preliminary assessment	__	__	__	__		✓					✓								1	41	1/0	75	1.78	T10	Complete	__	1				__	__	__	__	__	__	YES
31	raab2015	ReWalk	Observational study (Descriptive study)	Case study	70	60	5	28		✓	✓					✓		✓				✓	1	22	1/0	__	__	T11	Incomplete	1			1		__	__	__	__	↑	↔	YES
32	hartigan2015	Indego	Pilot study	Pilot clinical trial	5	90	__	__		✓	✓			✓		✓	✓		✓				16	18 -51	13/3	54 -102	1,57 - 1,93	C5, C6(2), T5(2), T6, T7(2), T9, T10(2), T11, T12(3), L1	Complete/Incomplete	__	11	3	2		X	X	__	__	__	__	YES
34	white2015	ReWalk	Pilot study	__	5	240	__	__	standard physiotherapy techniques	✓		✓											16	21 - 69	13/3	__	__	C3, C5, C6(3), T3, T4(3), T6, T7(2), T8, T9, T10, T12	__	__	8	4	3	1	__	__	__	__	__	__	YES
35	yang2015	ReWalk	Observational study (Cohort study)	Single-group observational study (NCT02118194)	Mean = 55 (range, 12 - 102)	60 - 120	__	__		✓		✓											12	18 - 65	10/2	64 - 100	1,52 - 1,85	C8(2), T1, T2(2), T4(2), T5, T7, T9, T10, T11	__	6,8 ± 5,4	9	2	1		X	X	__	X	__	__	YES
36	tsukahara2015	HAL	Pilot study	Feasibility study	x	__	6	12		✓													1	39	1/0	__	__	T7/T8	Complete	__	1				↑	__	__	__	__	__	EXO vs KAFO
39	asselin2015	ReWalk	Observational study (Pre-post study)	prospective, single-group observational study (NCT01454570)	12 -- 46	60-90	3	__		✓													8	24 -61	7/1	64 - 96	__	T1, T2, T4, T5, T7, T8, T9, T11	Complete	2 - 14	7	1			__	X	__	X	__	X	YES
40	benson2016	ReWalk	Pilot study	A longitudinal, prospective, self-controlled feasibility study (NCT01943669)	20	120	2	19 (range 10-31)		✓	✓	✓		✓	✓			✓				✓	5	23 - 41	5/0	__	__	C7, C8/T12, T2, T9, L1	Complete(3) /Incomplete(2)	2 - 7	3		2		↑	↑	↑	X	X	X	NO (if possible)
41	lonini2016	ReWalk	Pilot study	__	36	60	3	12		✓													11 (6)	26 - 63	3/1	__	__	T4, T8, T9, T10(2)	Complete	0,83 - 8					X	X	__	X	__	__	YES
44	stampacchia2016	EKSO	Pilot study	Feasibility study	1	40	__	__		✓		✓											21	21 - 68	17/4	__	__	C7, T3(2), T4(2), T6(2), T7(4), T9(2), T10, T12(3), L1(3), L2	Complete(14) /Incomplete(7)	0,17 - 28	12	2		7	__	__	__	__	__	__	YES
46	ha2016	Vanderbilt	Experimental validation	__	1	__	__	__		✓													3	19 - 43	3/0	54 - 82	1,75 - 1,85	T6, T8, T10	Complete/Sensory Incomplete(1)	2 - 11	2	1			__	__	__	__	__	__	YES
47	asselin2016	ReWalk	Pilot study	Pilot research study (NCT01454570)	60	60-90	3	__		✓	✓	✓	✓	✓		✓	✓	✓		✓		✓	12	24 - 64	10/2	64 - 100	1,52 - 1,85	C8/T8, C8, T1, T2(2), T4(2), T5, T7, T9, T10, T11	Complete/Incomplete	1,5 - 19	9	2	1		X	X	X	↑	__	__	YES
48	sale2016	EKSO	Pilot study	pilot single case experimental A-B (pre-post) design study (NNCT02065830)	20	50	3--4	__		✓	✓	✓											3	21 - 50	2/1	__	__	T6, T10, L1	__	__	2		1		↑	↑	↑	↑	__	__	YES
49	milia2016	EKSO	Observational study (Pre-post study)	__	20	45-60	5	4		✓													13	32 ± 10,4	10/3	__	__	C4, C5, C6, T4, T5(3), T6(2), T7, T10(2), T11, L1, L2, L3, L4, L5	Complete(7) /Sensory Incomplete(6)	__	7		6		__	↑	__	__	__	__	NO
50	platz2016	ReWalk	Observational study (Cohort study)	A prospective, single-group observational study	20 - 25	60	5	4 -- 5	Physical therapy	✓	✓	✓			✓								7	48.3 (10.2) [33–58]	5/2	72.6 (11.4) [56–88]	176 (7) [168–188]	T5(2), T10(2), T11, T12, L1	Complete/Incomplete	11.4 (10.1) [2–29]	6		1		X	__	__	__	__	__	YES
55	shimizu2017a	HAL	Observational study (Descriptive study)	Case study	10	60-90	2-8 AL MES	__		✓													4	20 - 67	3/1	__	__	C6, T6, T10, T11	Complete(1) /Sensory Incomplete(3)	2 - 6	3	1			__	__	__	__	__	__	YES
56	shimizu2017b	HAL	Observational study (Descriptive study)	Case study	10	20	__	12		✓													1	48	1/0	__	__	T12/L1	Incomplete	__			1		↑	__	__	↑	__	__	NO
57	birch2017	REX	Observational study (Cohort study)	prospective international, multisite, open label, nonrandomised, noncomparative, observational registry study (NCT02417532)	1	180-240	__	__		✓		✓											20	40.9 +/− 5.8 [19-65]	14/6	__	__	C4(3), C6(2), T1, T3, T4, T5(2), T7(2), T9, T10, T11(4), T12(2)	Complete(11) /Incomplete(9)	8,1 +/− 5.0 [1-52]	11				__	__	X	__	__	__	YES
59	chang2017	Other (HNP (HYBRID NEUROPROSTHESIS)	Experimental validation	__	1	__	__	__		✓		✓											3	54 - 59	3/0	64 - 92	1,75 - 1,93	T4(2), T11	Complete	7 - 32	1	2			__	__	__	X	__	__	YES
60	lemaire2017	ARKE	Observational study (Descriptive study)	Case study	12	30	2 -- 4	__		✓		✓											2	41 - 30	2/0	__	__	T6, T12	Complete	__					X	X	__	__	__	__	YES
61	tanabe2017	WPAL	Observational study (Descriptive study)	Case study	60	__	1	64		✓													1	20	1/0	__	__	C5 (motor incomplete)/T12 (complete)	Complete/Incomplete	1,5	1		1		__	__	__	__	__	__	YES
65	baunsgaard2017	EKSO	Observational study (Pre-post study)	Prospective quasi-experimental study, pre- and post-design (NCT02132702)	21	__	3	8	No control participation other trainings	✓		✓											52	35,8 (27,5-52,6) [IQR]	36/16	__	__	? Revisar	Complete(25) /Incomplete(27)	TSI ≤ 1 year --> 25(48%) [0,3 (0,2 - 0,4) ] · TSI > 1 year --> 27(52%) [5,5 (2,1-10,8)]					↑	__	↑	↑	__	__	NO (if possible)
66	baunsgaard2018	EKSO	Observation study (Exploratory study)	Prospective, observational, open-label multicentre study (NCT02132702))	24	60	3	8		✓		✓											52	35,8 (27,5-52,6) [IQR]	36/16	__	__	? Revisar	Complete(25) /Incomplete(27)	TSI ≤ 1 year --> 25(48%) [0,3 (0,2 - 0,4) ] · TSI > 1 year --> 27(52%) [5,5 (2,1-10,8)]					__	__	__	__	__	__	YES
67	juszczak2018	Indego	Observational study (Cross-sectional study)	__	26	__	__	8		✓	✓	✓		✓		✓				✓		✓	45	35 (SD= 12,65)	37/8	__	__	T1 - T8 (27), T9 - L2 (18)	Complete(30) /Incomplete(15)	3,9 (SD=5,13) [range: 0,25-23,75]	30	5	10		__	__	__	__	__	__	YES
71	wu2018	Othter (powered exoskeleton)	Pilot study	Feasibility study	16	60	2	8		✓		✓											2	36 - 38	2/0	58 - 62	1,70 - 1,80	T4, T10	Complete	__	2				↑	↑	↑	↑	__	__	EXO vs KAFO
73	ekelem2018	Indego	Experimental validation	Preliminary study	__	< 240	__	__		✓													2	__	__	66 - 88	1,73 - 1,83	T4, T11	Complete	5 - 8		2			__	X	__	__	__	__	YES
74	chang2018	EKSO	Pilot study	parallel-group randomized controlled pilot trial (NCT03011099,)	15	60	5	3		✓		✓											7	30 - 66	5/2	55 - 92	1,60 - 1,83	C4, C5, C7, T12(4)	Incomplete	2 - 34			2	5	↔	↑	↑	↔	__	__	NO
75	tefertiller2018	Indego	Observational study (Cohort study)	multicenter prospective observational cohort study (NCT02202538)	24	90-120	3	8		✓	✓	✓											32	range, 18-64; mean, 37	27/5	range, 52.1-104.8; mean (SD), 72.1 (12.8)	range, 152.4-190.5; mean (SD), 174.6 (9.4)	T4 - L2	__	__	21	5	6		↑	↑	↑	↑	__	__	YES
76	guanziroli2018	ReWalk	Observational study	Observational study; an open, non-comparative, non-randomized study	24	60	3	8		✓		✓											15	24 - 56	11/4	48 - 90	1,60 - 1,90	T4(3), T5(4), T6(2), T7(4), T8, T9, T10(2), T11(5), T12(4), L1, L4	Complete	5.47±4.68 [6 months to 15 years]					X	X	__	__	__	__	YES
78	gagnon2018	EKSO	Pilot study	A single-group longitudinal prospective feasibility study	18	60	3	6		✓		✓											14	27 - 63	__	49 - 107	1,60 - 1,92	C6, T3, T4(2), T6(6), T8, T9, T10(2)	Complete	1 - 31	13	1			↑	__	__	↑	__	__	YES
82	sale2018	EKSO	Observational (Pre-post study)	Prospective quasi-experimental study, pre- and post-design	20	45	4--5	5		✓	✓	✓											8	21 - 67	6/2	__	__	T1(2), T7, T10, T12, L1(2), L2	-	__	3	4	1		↑	↑	↑	↑	__	__	YES
86	alamro2018	EKSO	Observational study (Cohort study)	Quasi-randomized	5	__	__	__		✓													8	32 - 52	7/1	68 - 100	1,70 - 1,91	C7(3), T3(2), T4(3)	Sensory Incomplete	1 - 25	6	2			__	__	__	X	__	__	YES

## Sheet: STROKE
					TRAINING																		DEMOGRAPHICS								OUTCOMES
					Training Protocol					Training Environment
ID	Reference	Device	Study design		Number of sessions	Duration (min)	Frequency (per week)	Duration (weeks)	Additional Training	Indoor walking	Outdoor walking	Sit-stand	Lateral movement	Ramps	Stairs	Carpet	Grass	Obstacles	Elevator	Doors	Home use	Other	Number	Age (years)	Gender (M/F)	Weight (Kg)	Height (m)	Injury level	Right/Left hemiplegia	TSI (years)	10mWT	6MWT	TUG	GAIT SPEED	FLUGL-MEYER	MEASUREMENT WITH EXO
1	Kawamoto2009	HAL	Experimental validation	__	4	60	1	4		✓													1	59	1/0	__	__	__	1/0	__	↑	__	__	↑	__	WITH HAL vs WITHOUT HAL
13	ueba2013	HAL	Observational study (Cohort study)	Prospective cohort study	12.1 ± 7.0	__	__	__		✓													22	66.6 ± 17.7	7/15	__	__	SaH(9), ICH(7), CI(6)	__	__	__	__	__	__	__	NO
20	stein2014	TIBION BIONEC LEG	Pilot study	Randomized controlled pilot study	18	60	3	6		✓		✓	✓										12 (exo) / 12 (control)	57.6 ± 10.7 (exo) / 56.6 ± 15.1	(10/2)exo/(7/5)	__	__	__	__	49,1 ± 38,9 (exo)/ 88,5 ± 153 months	↔	↔	↔	↔	__	NO
22	watanabe2014	HAL	Pilot study	Randomized open controlled pilot trial	12	20	3	4	Phisiotherapy	✓		✓											22 (11/11)	67,0 ± 16,8 (HAL GROUP) / 75,6 ± 13,9	(7/4 exo) / (4/7)	58,0 ± 11,2 (HAL GROUP) / 56,7 ± 18,5	159,9 ± 8,5 (HAL GROUP) / 156,7 ± 10,5	I(12), H(10)	11/11	58,9 ± 46,5 (exo) / 50,6 ± 33,8 days	__	↔	↔	↔	↔	NO
24	murray2014	VANDERBILT	Experimental validation	Experimental implementation and preliminary validation	3	60	1	7		✓													3	39 - 69	__	__	__	__	2/1	3 - 17 months	X	__	__	↑	__	NO
28	lifang2015	TIBION BIONEC LEG	Observational study (Descriptive study)	Case study	15	60	5	3		✓		✓	✓		✓			✓					3	53 - 62	1/2	55 - 72	1,85 - 1,65	I(2), H(1)	2/1	0,67 - 5 years	__	__	__	↑	↔	NO
37	ogata2015	HAL	Observational study (Cohort study)	Retrospective study	3 - 6	__	__	__		✓													91 (14/77)	49 - 77	5/9	__	__	ICH	11/3	__	__	↔	↔	__	↔	NO
38	bortole2015	H2	Pilot study	Pilot pre-clinical study (NCT02114450)	12	__	__	4		✓		✓											3	43 - 58	3/0	84 - 89	1,78 - 1,92	__	0/3	0,5 - 12 years	__	↔	↔	__	↔	NO
43	buesing2015	SMA	Randomized Control Trial	Single blinded randomized control trial (NCT01994395)	18	45	3	6 - 8		✓	✓	✓	✓	✓	✓	✓	✓	✓					50 (25/25)	FTST(62 ± 3) ; SMA (60 ± 2)	(17/8 exo) / (16/9)	__	__	__	25/25	FTST (5.4 ± 0,8) ; SMA (7.1 ± 1,5) years	__	__	__	↑	__	NO
45	kasai2016	HAL	Pilot study	__	__	__	__	__		✓		✓											5	28 - 84	3/2	__	__	__	3/2	__	__	__	__	__	__	With vs. Without exo
51	mizukami2016	HAL	Pilot study	__	20 - 25	__	5	5	CGT	✓													8	26 - 76	5/3	__	__	CI(3), B(5)	5/3	132,6 ± 18,52 days	X	__	__	↑	__	NO
52	molteni2017	EKSO	Pilot study	prospective, pilot pre-post, open label, non-randomized experimental study	12	60	3	4	CGT	✓													23	43.8±13.3 (SUB-ACUTE) / 55.5±15.9 (CHRONIC)	12/11	__	__	I(13), H(9)	11/12	25 - 180 (subacute) / 181 - 2350 (chronic) days	↔	↑	__	↑	__	NO
53	Kawasaki2017	Other (Robot-KAFO)	Pilot study	Preliminary study	1	__	__	__		✓													17	51.6 ± 14.4	14/3	63.6 ± 7.4	169.6 ± 7.8	I(5), H(11), T(1)	10/7	8 ± 4,2 years	↑	__	__	↑	__	Disabled
58	watanabe2017	HAL	Randomized Control Trial	2-month follow-up, randomized, controlled study	12	__	3	4	Phisiotherapy	✓													24 (12/12)	66,9 ± 16 (HAL GROUP) / 76,8 ± 13,8 (CONTROL)	(8/4 exo) / (8/4)	__	__	__	__	57 ± 44,3 (exo) / 48,1 ± 33,3 days	__	↔	↔	↔	↔	NO
62	yeung2017	Other (powered AFO)	Pilot study	__	1	__	__	__		✓					✓								1	58 - 72	2/1	__	__	I(1), H(2)	2/1	2 - 13,5 years	X	X	__	__	X	NO
68	hassan2018	HAL	Pilot study	Feasibility study	1	__	__	__		✓													5	44 - 62	4/1	__	__	CH(3), SaH(1), CI(1)	0/5	4 - 18 years	↓	__	__	↓	__	NO-ROBOT vs ROBOT SYSTEM1 vs ROBOT SYSTEM2
69	androwis2018	EKSO GT	Experimental validation	Applicability of a novel EMG technique	1	120	__	__		✓													5	30 - 73	3/2	81.6 ± 3.6 kg	1.7 ± 0.1	__	2/3	34.8 ± 34 days	__	__	__	__	__	EXO vs NO-EXO
70	tan2018	HAL	Observational study (Longitudinal study)	Longitudinal pre-post design	9	60	3	3		✓													8	43 - 80	4/4	__	__	ACI(3), SH(1), BSI(1), LI(2), ABSI(1)	4/4	__	__	__	__	↑	↑	NO
79	calabro2018	EKSO	Randomized Control Trial	Randomized clinical trial (prospective, assessor blinded, parallel group study) (NCT03162263)	40	60 + 45	5	8	Conventional physiotherapy (Everyone)	✓		✓											40 (20/20)	55 - 77	(12/8 exo) / (11/9)	__	__	I	__	0,5 - 1 years	↑	__	↑	↑	__	NO
83	contreras-vidal2018	H2	Pilot study	Pilot, open-label clinical study (NCT02114450)	12	__	3	4		✓		✓											5	40 - 67	5/0	__	__	I(2), H(1), I+H(1)	1/4	0,5 - 14 years	__	↔	↔	↑	↔	NO
85	yeung2018	Other (powered AFO)	Randomized Control Trial	Double-blinded, parallel-group, randomized, sham-controlled clinical trial with 3-month follow-up (NCT02471248. Registered)	20	60	2	10		✓					✓								19 (9/10)	57.9 ± 12.0	(6/3 exo) / (7/3)	__	__	I(14), H(5)	9/10	5.2 ± 3.7 YEARS	↑	↔	__	↑	↑	NO
87	jayaraman2019	SMA	Randomized Control Trial	Randomized, single-blind, parallel study. (NCT01994395)	18	45	3	6 - 8		✓		✓			✓			✓					50 (25/25)	FTST(61.6 ± 12.6) ; SMA(59.5 ± 9.7)	(17/8 exo) / 16/9	__	__	I(33), H (17)	25/25	FTST (5.4 ± 3.0) ; SMA (7.1 ± 6.2) years	↑	↑	__	↑	↑	NO

## Sheet: OTHER
						TRAINING																		DEMOGRAPHICS						OUTCOMES
						Training Protocol					Training environment
ID	Reference	Device	Disease	Study design		Number of sessions	Duration (min)	Frequency (per week)	Duration (weeks)	Additional Training	Indoor walking	Outdoor walking	Sit-stand	Lateral movement	Ramps	Stairs	Carpet	Grass	Obstacles	Elevator	Doors	Home use	Other	Number	Age (years)	Gender (M/F)	Weight (Kg)	Height (m)	TSI (years)	10mWT	6MWT	TUG	GAIT SPEED	MEASURMENT WITH EXO
12	arazpour2013b	Other (SCKAFO)	PM	Observational study (Longitudinal study)	Crossover design (Devices comparison)	__	120	__	__		✓													1	54	1/0	68	1.68	47	__	__	__	↓	KAFO vs POWERED SCKAFO
33	mao2015	Tibion Bionic Leg	BTS	Observational study (Descriptive study)	Case study	15	60	5	3		✓					✓								1	57	0/1	__	__	3,5	__	__	__	__	NO
42	arazpour2015	Other (KAFO)	PM	Pilot study	__	5	120	5	2		✓		✓											7	47 - 57	__	65 - 76	__	__	__	X	__	↑	Walking with locked KAFO vs. Walking with powered KAFO
54	chen2017	CUHK-EXO	PM	Pilot study	Pilot clinical study	4	__	__	__		✓		✓				✓							1	28	1/0	66	1.65	2	__	__	__	__	YES
63	lerner2017	Other (exoskeleton)	CP	Observational study (Cohort study)	__	6	120-180	__	8 -12		✓													7	5 - 19	4/3	20 - 69	1,11 - 1,72	__	__	__	__	↑	Disabled
64	boes2017	Other (PPAFO)	MS	Observational study (Longitudinal study)	Randomized crossover short-term intervention	1	__	__	__		✓													16	54.6 ± 5.3	4/12	__	__	__	__	X	__	__	YES
72	tsukahara2018	Curara	SCD	Experimental validation	Evaluation study	1	90-120	__	__		✓													12	__	6/6	__	__	2 - 26	__	__	__	↔	With vs. Without exoskeleton
77	mcgibbon2018	KEEOGO	MS	Crossover Randomized Control Trial	multicentre, open-label, randomized, cross-over trial (NCT02904382)	4 (weeks at home)	60	__	__		✓	✓	✓									✓		29	49.2 ± 10.6	12/17	72,9 ± 17,5	169,9 ± 9,6	__	__	↓	↓	__	With vs. Without exoskeleton
80	mataki2018	HAL	CP	Observational study (Descriptive study)	Case study	2	30	__	__	Physical therapy	✓													1	15	1/0	50	1.6	__	↑	__	__	↑	NO
81	matsuda2018	HAL	CP	Pilot study	Evaluation study	12	__	2 - 4	4		✓													6	13 - 24	4/2	45 - 51	1,40 - 1,60	__	↑	↑	__	↑	NO
84	nolan2018	EKSO	TBI	Pilot study	__	12	__	3	4		✓													1	21	1/0	75	1.85	__	__	__	__	↓	With vs. Without exoskeleton
