# Supplementary material for: Systematic review on wearable lower-limb exoskeletons for gait training in neuromuscular impairments
Source: J Neuroeng Rehabil. 2021 Feb 1;18:22. doi: 10.1186/s12984-021-00815-5 (PMC7852187; doi:10.1186/s12984-021-00815-5)
Supplement: Supplementary file 4 — Additional file 4. Outcomes measures. [file 12984_2021_815_MOESM4_ESM.xlsx]

## Sheet: Identification (ID)
	Addtional File 4
	ID	Reference		ID	Reference		ID	Reference		ID	Reference
	1	Kawamoto2009		26	Kozlowski2015		51	Mizukami2016		76	Guanziroli2018
	2	Farris2011		27	Evans2015		52	Molteni2017		77	Mcgibbon2018
	3	Quintero2012		28	Lifang2015		53	Kawasaki2017		78	Gagnon2018
	4	Farris2012		29	Del-ama2015		54	Chen2017		79	Calabro2018
	5	Ha2012		30	Ekelem2015		55	Shimizu2017a		80	Mataki2018
	6	Esquenazi2012		31	Raab2015		56	Shimizu2017b		81	Matsuda2018
	7	Zeilig2012		32	Hartigan2015		57	Birch2017		82	Sale2018
	8	Bishop2012		33	Mao2015		58	Watanabe2017		83	Contreras-vidal2018
	9	Fineberg2013		34	White2015		59	Chang2017		84	Nolan2018
	10	Tanabe2013a		35	Yang2015		60	Lemaire2017		85	Yeung2018
	11	Arazpour2013a		36	Tsukahara2015		61	Tanabe2017		86	Alamro2018
	12	Arazpour2013b		37	Ogata2015		62	Yeung2017		87	Jayaraman2019
	13	Ueba2013		38	Bortole2015		63	Lerner2017
	14	Tanabe2013b		39	Asselin2015		64	Boes2017
	15	Spungen2013		40	Benson2015		65	Baunsgaard2017
	16	Jun-young2013		41	Lonini2016		66	Baunsgaard2018
	17	Talaty2013		42	Arazpour2015		67	Juszczak2018
	18	Kim2013		43	Buesing2015		68	Hassan2018
	19	Kolakowsky-Hayner2013		44	Stampacchia2016		69	Androwis2018
	20	Stein2014		45	Kasai2016		70	Tan2018
	21	Del-Ama2014		46	Ha2016		71	Wu2018
	22	Watanabe2014		47	Asselin2016		72	Tsukahara2018
	23	Farris2014		48	Sale2016		73	Ekelem2018
	24	Murray2014		49	Milia2016		74	Chang2018
	25	Kressler2014		50	Platz2016		75	Tefertiller2018

## Sheet: Outcome Measures
	Category	Outcome Measure	Number of Studies (ID)
	Ambulation Assessments	Gait speed	3	6	9	11	12	14	15	17	18	19	20	21	22	23	24	26	27	28	32	35	39	41	42	43	47	48	51	52	53	56	58	59	63	65	68	70	71	72	74	75	78	79	80	81	82	83	84
		10mWT	1	6	7	8	15	20	21	23	24	25	29	32	35	36	41	40	47	48	50	51	52	53	56	60	62	65	68	71	74	75	76	78	79	80	81	82	85	87
		6MWT	6	7	8	11	15	20	21	22	23	27	29	32	35	37	38	39	41	40	42	47	48	49	52	58	60	62	64	71	73	74	75	76	77	81	82	83	85	87
		TUG	3	6	7	8	20	22	23	37	38	40	47	48	57	58	65	71	74	75	77	79	82	83
		Cadence	18	22	28	36	48	51	56	58	59	63	70	71	72	74	79	80	81	82	83	43
		Step length	12	18	19	28	32	48	63	68	70	74	81	84	85	43
		Number of steps	22	26	36	41	44	49	52	53	60	61	65	71	78	83
		Stride length	1	28	51	58	72	74	82	43
		Max time	10	11	14	18	26	60	61	65
		Swing time	41	61	79	82	84	85	43
		Stance time	68	70	78	82	84	85	43
		Max distance	10	11	14	19	60	61	65
		Sit-to-stand transitions	45	50	54	60	76
		vGRF	1	9	28	61	85																														SCI
		Distance walked	27	42	55	64	71																														STROKE
		Double support	61	82	84	43																															OTHER
		2MWT	25	26	51
		10MWT	22	36
		Symetric property	36	43
		Step time	35	43
		10mWT curve	50	68
		5xSST	20	87
		600mWT	75
		Step width	48
		Step delay	41
		Step height	32
		SLA	24
		Lateral Range	12
		Vertical Range	12
		TST	77
		Walking time	78
		Stairs	50
		500m Outdoor	50
		Distance time	85
		BBS	8	20	28	31	33	38	51	62	65	83	85	87
		Fugl-Meyer	22	28	33	38	51	58	62	70	83	85	87
		RoM	19	26	34	44	47	57	66	68	82
		FAC	22	51	52	58	61	62	67	85
		Balance	22	26	50	60	87
	Balance and level of assistance /Indpendence	LOA	47	50	57	78
		WISCII	36	44	56	65
		Barthel Index	37	38	83
		LEMS	55	65	74
		FGI	38	83
		FIM	37	70
		SCIM	44	66
		ASIA	31	55
		FGA	87
		CFE	20
		DGI	31
		MI	52
		RMI	79
		SMI	79
		TCT	52
		WHS	52
		mRS	51
		GMFM	81
		BUT-A	49
		INSCI	47
		GAS	31
		MAS	44
		Motor Function	19
		PSFS	44
		Proprioception	19
	Physiological Improvements	Spasticity	6	12	19	21	25	26	40	49	52	55	62	63	66	67	85
		Pain	6	7	19	21	25	29	40	44	48	66	67	82	87
		BMD	6	7	18	39	47	71
		Skin	6	7	40	57	65
		Bowel	66	67
		Bladder	66	67
		Brunston	37	45
		MMT	21
		Join integrity	7
		LUTS	66
		Strength	63
		BFM	18
	Energy expenditure	Heart rate	6	7	11	14	15	21	23	25	26	27	29	31	35	39	40	42	65	71	82
		EMG	6	10	13	14	17	25	28	45	53	55	56	61	63	69	70	79	86
		Blood Pressure	6	7	13	15	21	26	29	31	35	40	65	71	82
		Borg Scale	14	15	26	27	39	48	65	67	82
		Fatigue	5	6	7	8	21	29	40	48	82
		PCI	11	14	23	42	51	81
		V02	27	39	64	65	71
		EEG	25	79	83
		METs	26	27
		%VO2	27	39
		GXT	25	27
		Walking economy	27
	Usability and Comfort	General survey	6	7	40	44	57
		Satisfaction test	29	48	50	82
		QoL	66	67	87
		Comfort	21	29
		SF-36	6	31
		SF12-V2	50
		Depression	87
		Incidence of falls	87
		KNEE (angle)	1	2	3	16	17	28	29	30	33	35	38	41	46	53	54	59	63	68	70	73	80	81	83	84	85
		HIP (angle)	1	2	3	16	17	28	30	35	38	41	46	54	59	61	68	70	73	80	81	83	84	85
		3D motion capture	6	12	16	17	28	33	48	62	68	69	70	72	73	74	82	84	85
		temporospatial data	6	16	17	28	48	62	69	70	72	74	80	82	84	85	87
	Biomechanics	ANKLE (angle)	17	28	38	62	70	80	83	84	85
		KNEE (torque)	1	4	28	33	38	46	54
		HIP (torque)	4	5	28	38	46	54
		TRUNK (angle)	17	61	80
		ANKLE (torque)	28	38
[truncated: 3 more columns]
